# Supplementary material
Source: Research Square preprint supplement (doi:10.21203/rs.3.rs-10261247/v1)
Supplement: Supplementary file 1 [file 08de587e8cdb66247290b9e1.docx]

# Supplementary Information for “Compact single-shot wavefront sensing via *k*-space shifting in dual-layer metasurfaces”

Wenyu Chen,1 Zixin Zhao,1 Renjie Zhou,2,4 Nicholas X. Fang, *5,11,12 Weijie Deng,6,7 Din Ping Tsai,8,9,10 Liang Gao,*1,2 & Jinlong Zhu*1,2,3

1 State Key Laboratory of Intelligent Manufacturing Equipment and Technology, Huazhong University of Science and Technology, Wuhan 430074, People’s Republic of China.

2 Shenzhen Huazhong University of Science and Technology Research Institute, Shenzhen 518057, China

3 Optics Valley Laboratory, Wuhan, Hubei 430074, People’s Republic of China.

4 Department of Biomedical Engineering, The Chinese University of Hong Kong, Hong Kong, China.

5 Department of Mechanical Engineering, University of Hong Kong, Hong Kong, China.

6 Changchun Institute of Optics, Fine Mechanics and Physics, Chinese Academy of Sciences, Changchun, Jilin 130033, China.

7 State Key Laboratory of Advanced Manufacturing for Optical Systems, Changchun, Jilin 130033, China.

8 Department of Electrical Engineering and State Key Laboratory of Optical Quantum Materials, City University of Hong Kong, Kowloon, Hong Kong SAR 999077, China.

9 State Key Laboratory of Terahertz and Millimeter Waves, City University of Hong Kong, Kowloon, Hong Kong SAR 999077, China.

10 Department of Physics, City University of Hong Kong, Kowloon, Hong Kong SAR 999077, China.

11 State Key Laboratory of Optical Quantum Materials, The University of Hong Kong, Pokfulam Road, Hong Kong SAR, China.

12 Materials Innovation Institute for Life Sciences and Energy (MILES), HKU-SIRI, Shenzhen, China.

**corresponding authors:**

*Nicholas X. Fang, *Liang Gao, *Jinlong Zhu

Email: [nicxfang@hku.hk](mailto:nicxfang@hku.hk), [gaoliang@hust.edu.cn](mailto:gaoliang@hust.edu.cn), [jinlongzhu03@hust.edu.cn](mailto:jinlongzhu03@hust.edu.cn)

## Supplementary Note 1: Principle of *k*-space-shifted wavefront sensing

Under the paraxial approximation, the complex amplitude of the monochromatic incident light field at a sample point can be treated as a planar incident wavefront, which can be expressed as:

(S1)

where *A* is the complex amplitude of the field and the *kx* is the wavevector component along the *x*-direction. The first layer, pixelated deflector, introduces a linear phase gradient that deflects the transmitted beam by a predetermined angle *θd*. The amplitude transmittance function of the ±*x* deflectors can be expressed as:

(S2)

where *L* is the aperture size of the deflectors, *kd* is designed deflection spatial frequency: . The exponential phase factor represents the linear phase gradient imparted by the defectors, shifting the angular spectrum of the transmitted light by ±*kd*. The light field passing through the ±*x* deflectors, , can be calculated by the following equation:

(S3)

The angular spectrum of the light field  is:

(S4)

The second layer is a nonlocal metasurface that acts as a high-pass spatial filter. Its power transmittance can be expressed as:

(S5)

The light field passes through the non-local metasurface, and the filtered angular power spectrum can be calculated as:

(S6)

The ±*x* detectors measure the integrated optical power over the sampling area. According to Parseval’s theorem, the transmitted power can be calculated from the angular spectrum:

(S7)

Substituting Equations (S4-S6) into Equation (S7):

(S8)

The peak values of the intensities *I*±*x*(*kx*) are located at *kd* and -*kd*, as shown in Fig. 1e. To eliminate the influence of the intensity |*A*|2 of the incident wavefront and measure *kx* in a single-shot manner, the intensity ratio *Rx* is defined as:

(S9)

## Supplementary Note 2: The effects of the parameter *kd* on the pixelated deflector


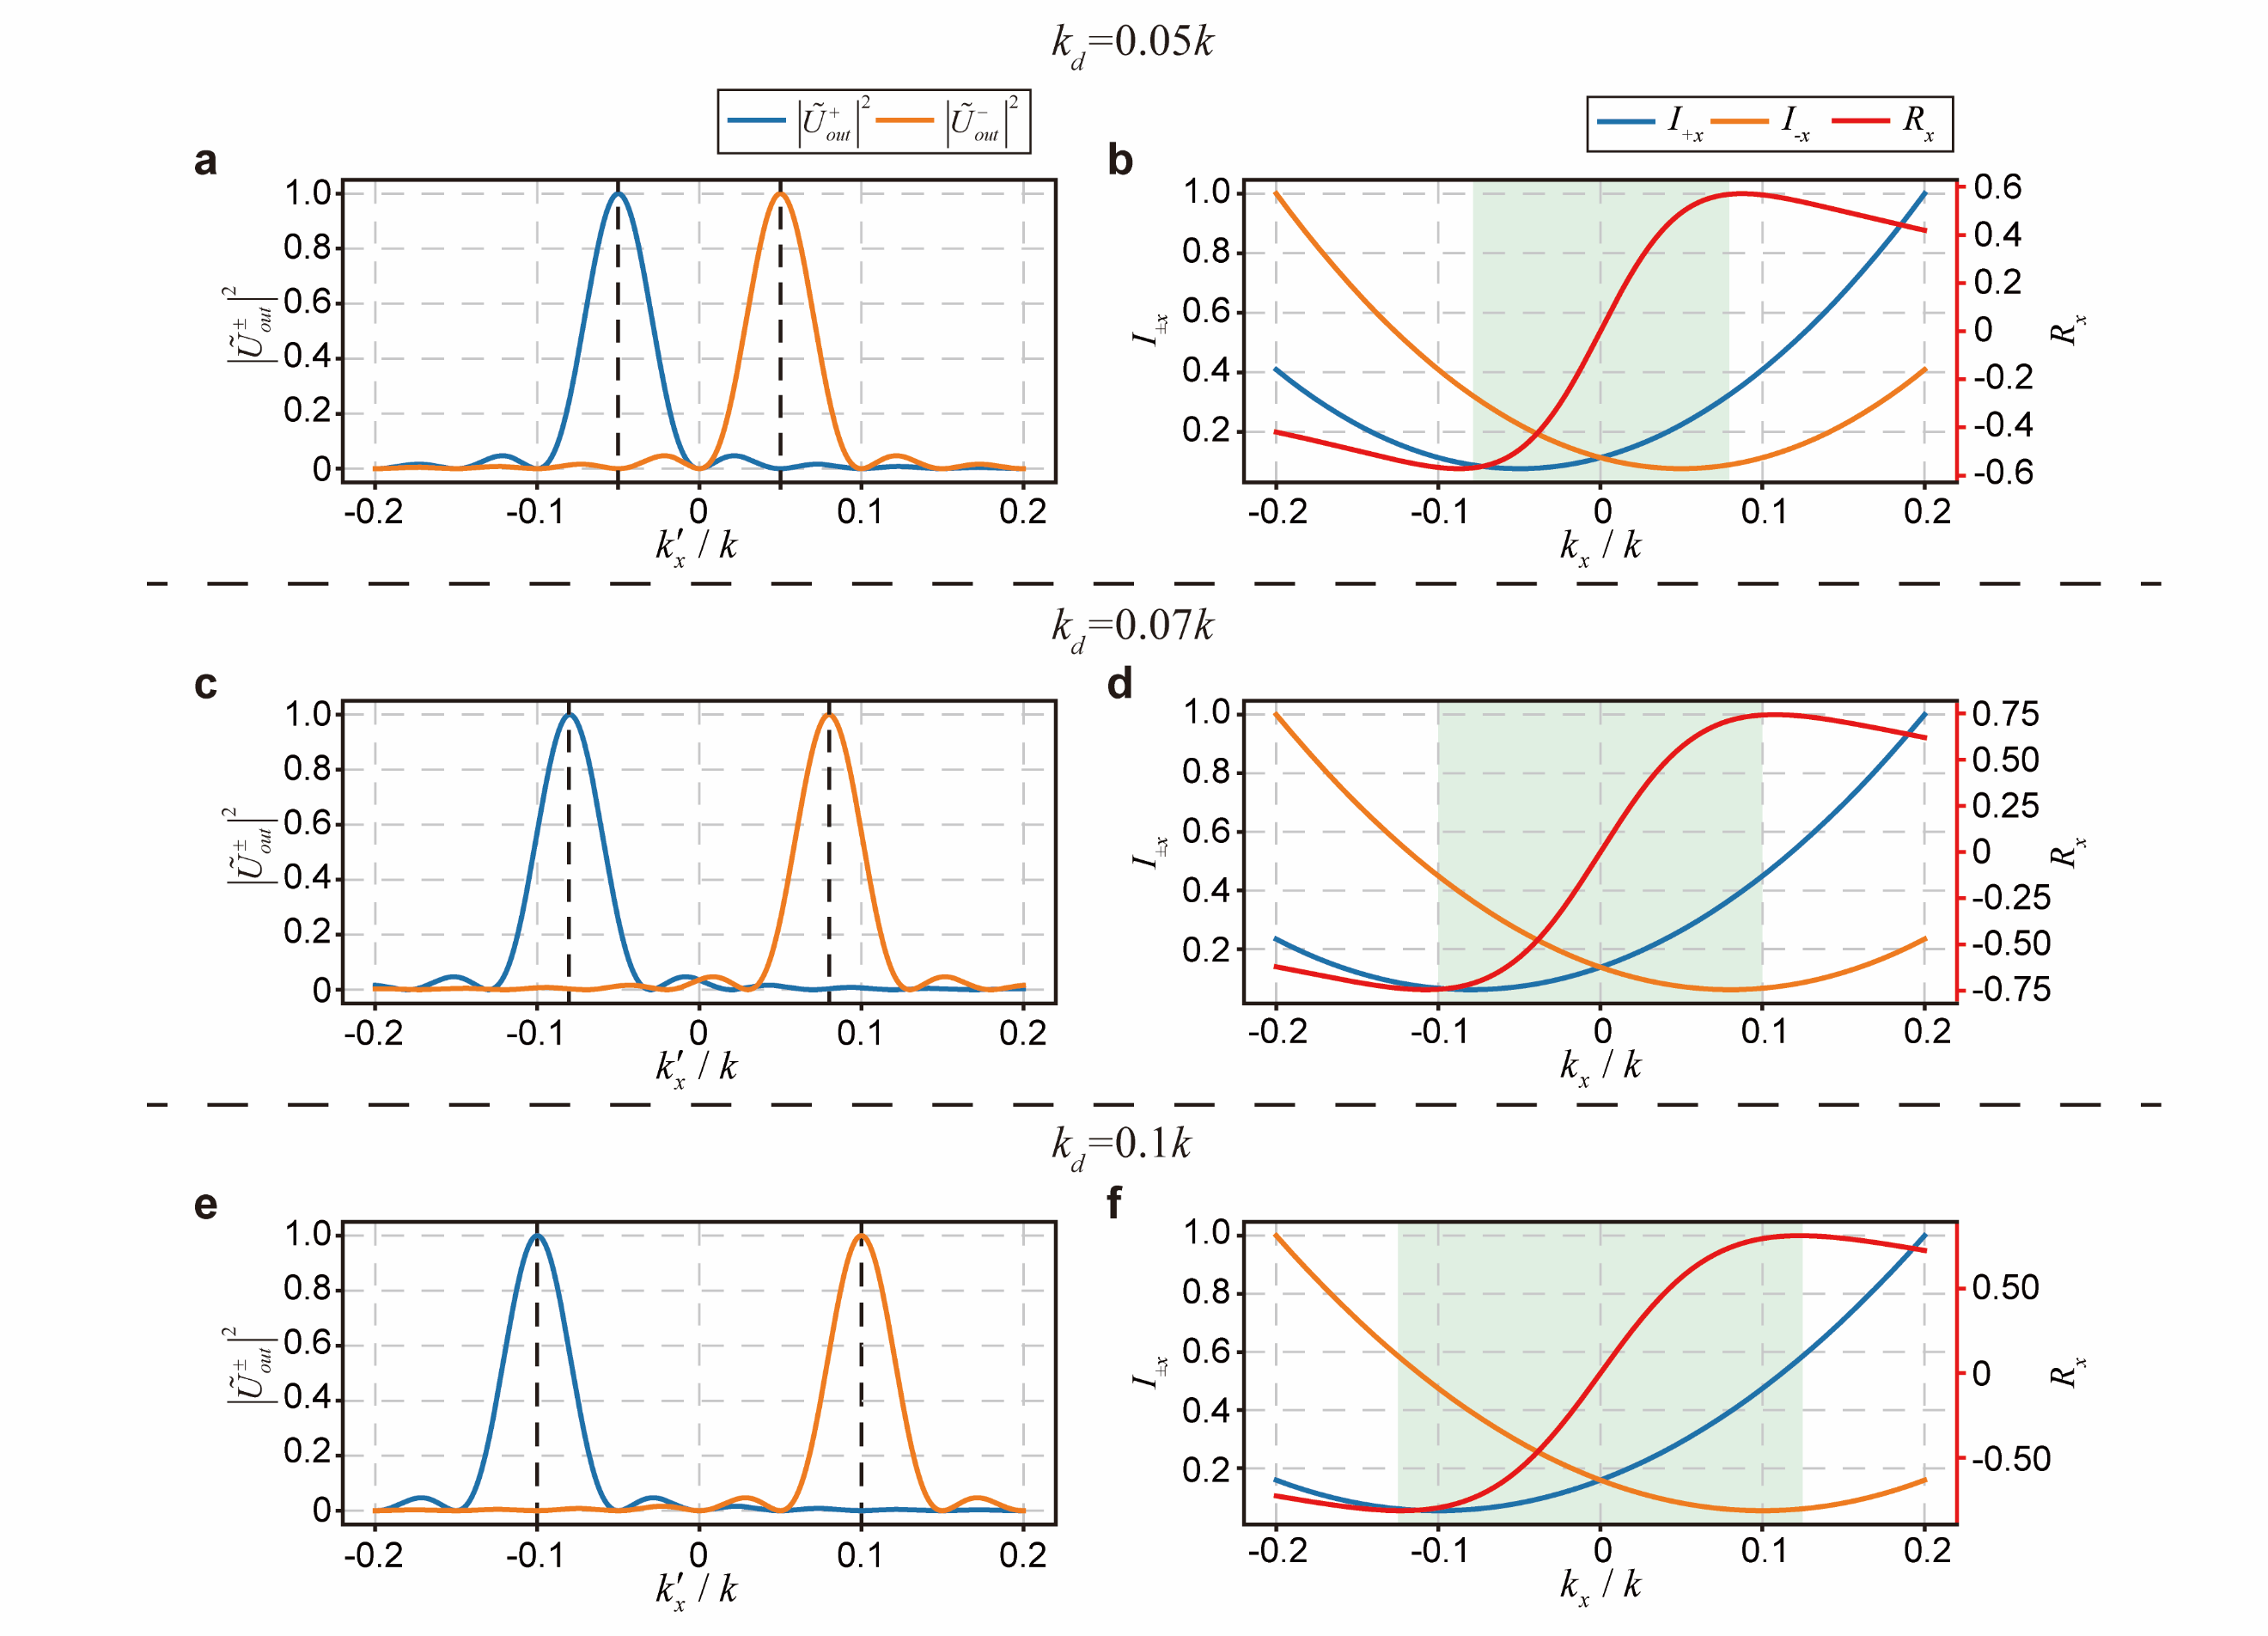


**Figure S1.** The effects of the parameter *kd* of the pixelated deflector. **a**, **c**, **e** Calculated angular power spectra () of the pixelated defectors designed with deflection spatial frequencies of *kd*=0.05*k*, 0.07*k*, and 0.1*k*, respectively. The vertical dashed lines indicate the peak positions of the shifted spectra. **d**, **e**, **f** The corresponding simulated intensities *I±x* and the intensity ratio *Rx* as functions of the incident spatial frequency *kx*. The shaded green regions denote the effective measurement range.

The deflection spatial frequency, *kd*, is a critical design parameter that governs the performance of the wavefront sensing system. As shown in Fig. S1, increasing *kd* (from 0.05*k* to 0.1*k*) effectively separates the angular power spectra of the ±*x* deflectors in the Fourier domain (Figs. S1a, c, e). This separation significantly broadens the monotonic region (highlighted in green), thereby increasing the system's dynamic range for spatial-frequency measurements. However, this expansion comes at the expense of phase-gradient sensitivity, which is defined by the slope of the intensity ratio curve *Rx*/*kx*. A smaller *kd* yields a steeper slope (Fig. S1b), providing higher sensitivity to minute phase gradients. Conversely, a larger *kd* extends the measurable range (Fig. S1f) but reduces the slope, thereby lowering sensitivity. Therefore, the selection of *kd* represents a fundamental trade-off between the maximum measurable numerical aperture (dynamic range) and phase-gradient resolution (sensitivity).

## Supplementary Note 3: Design and simulation of the deflector

Figure S2 illustrates the detailed simulation results of the deflectors. The deflector unit is shown in Fig. S2a, and the transmission and phase shift as a function of diameter are shown in Fig. S2b.


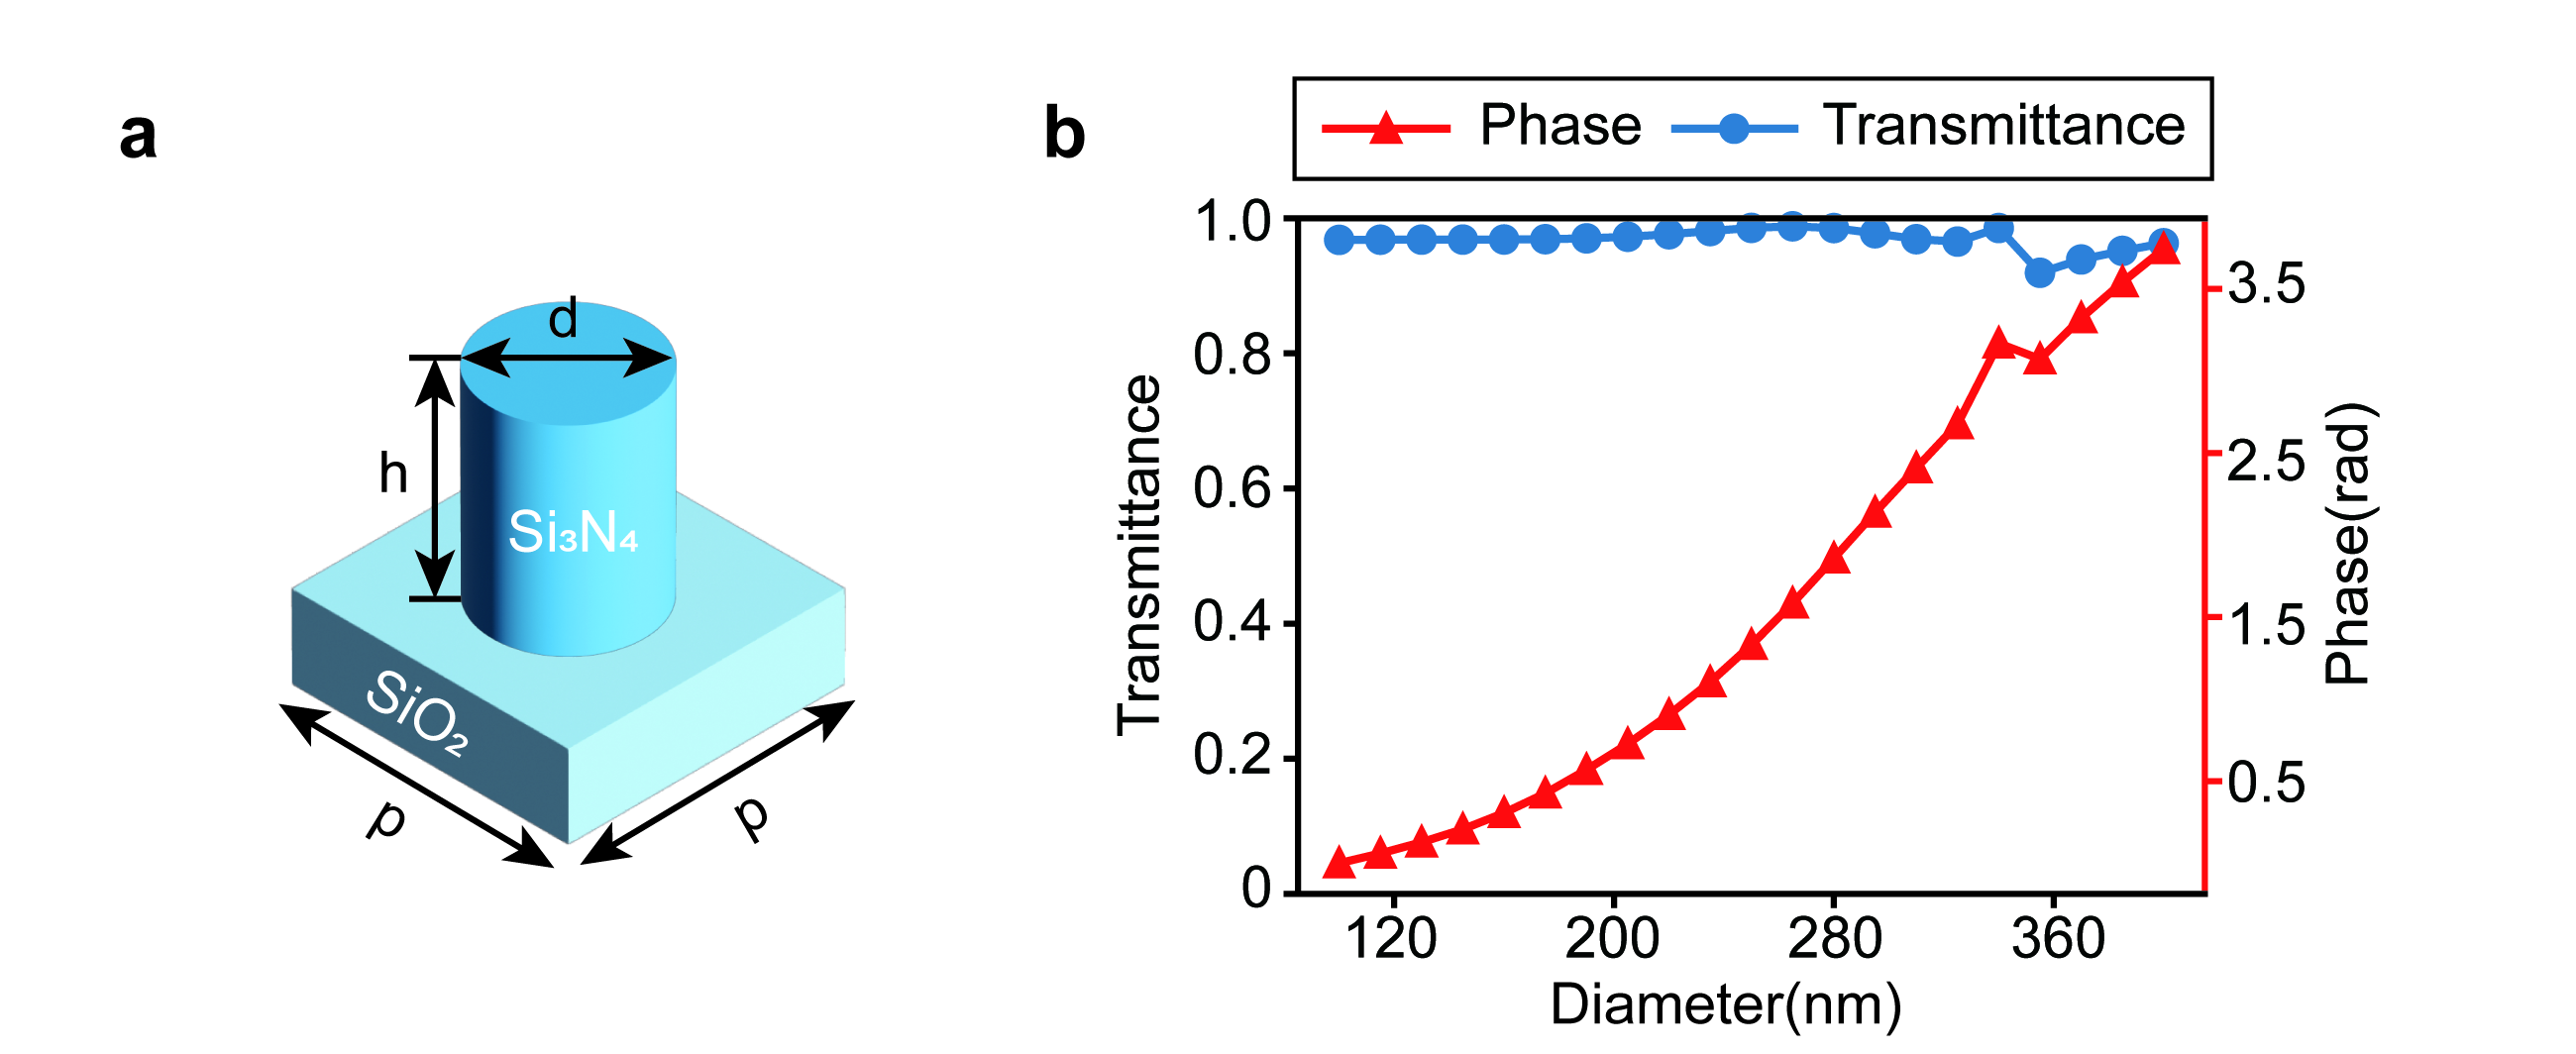


**Figure S2.** Design and simulation of the deflector. **a** Schematic of the nanopillar in the Lumerical RCWA solver. **b** Simulation of phase delay and transmission through a building block for a deflector (Si3N4 nanopillar with a period of 500 nm and a height of 700 nm) as a function of diameter *d*.

## Supplementary Note 4: Two-dimensional transmittance spectra of the nonlocal metasurface and the dual-layer metasurface


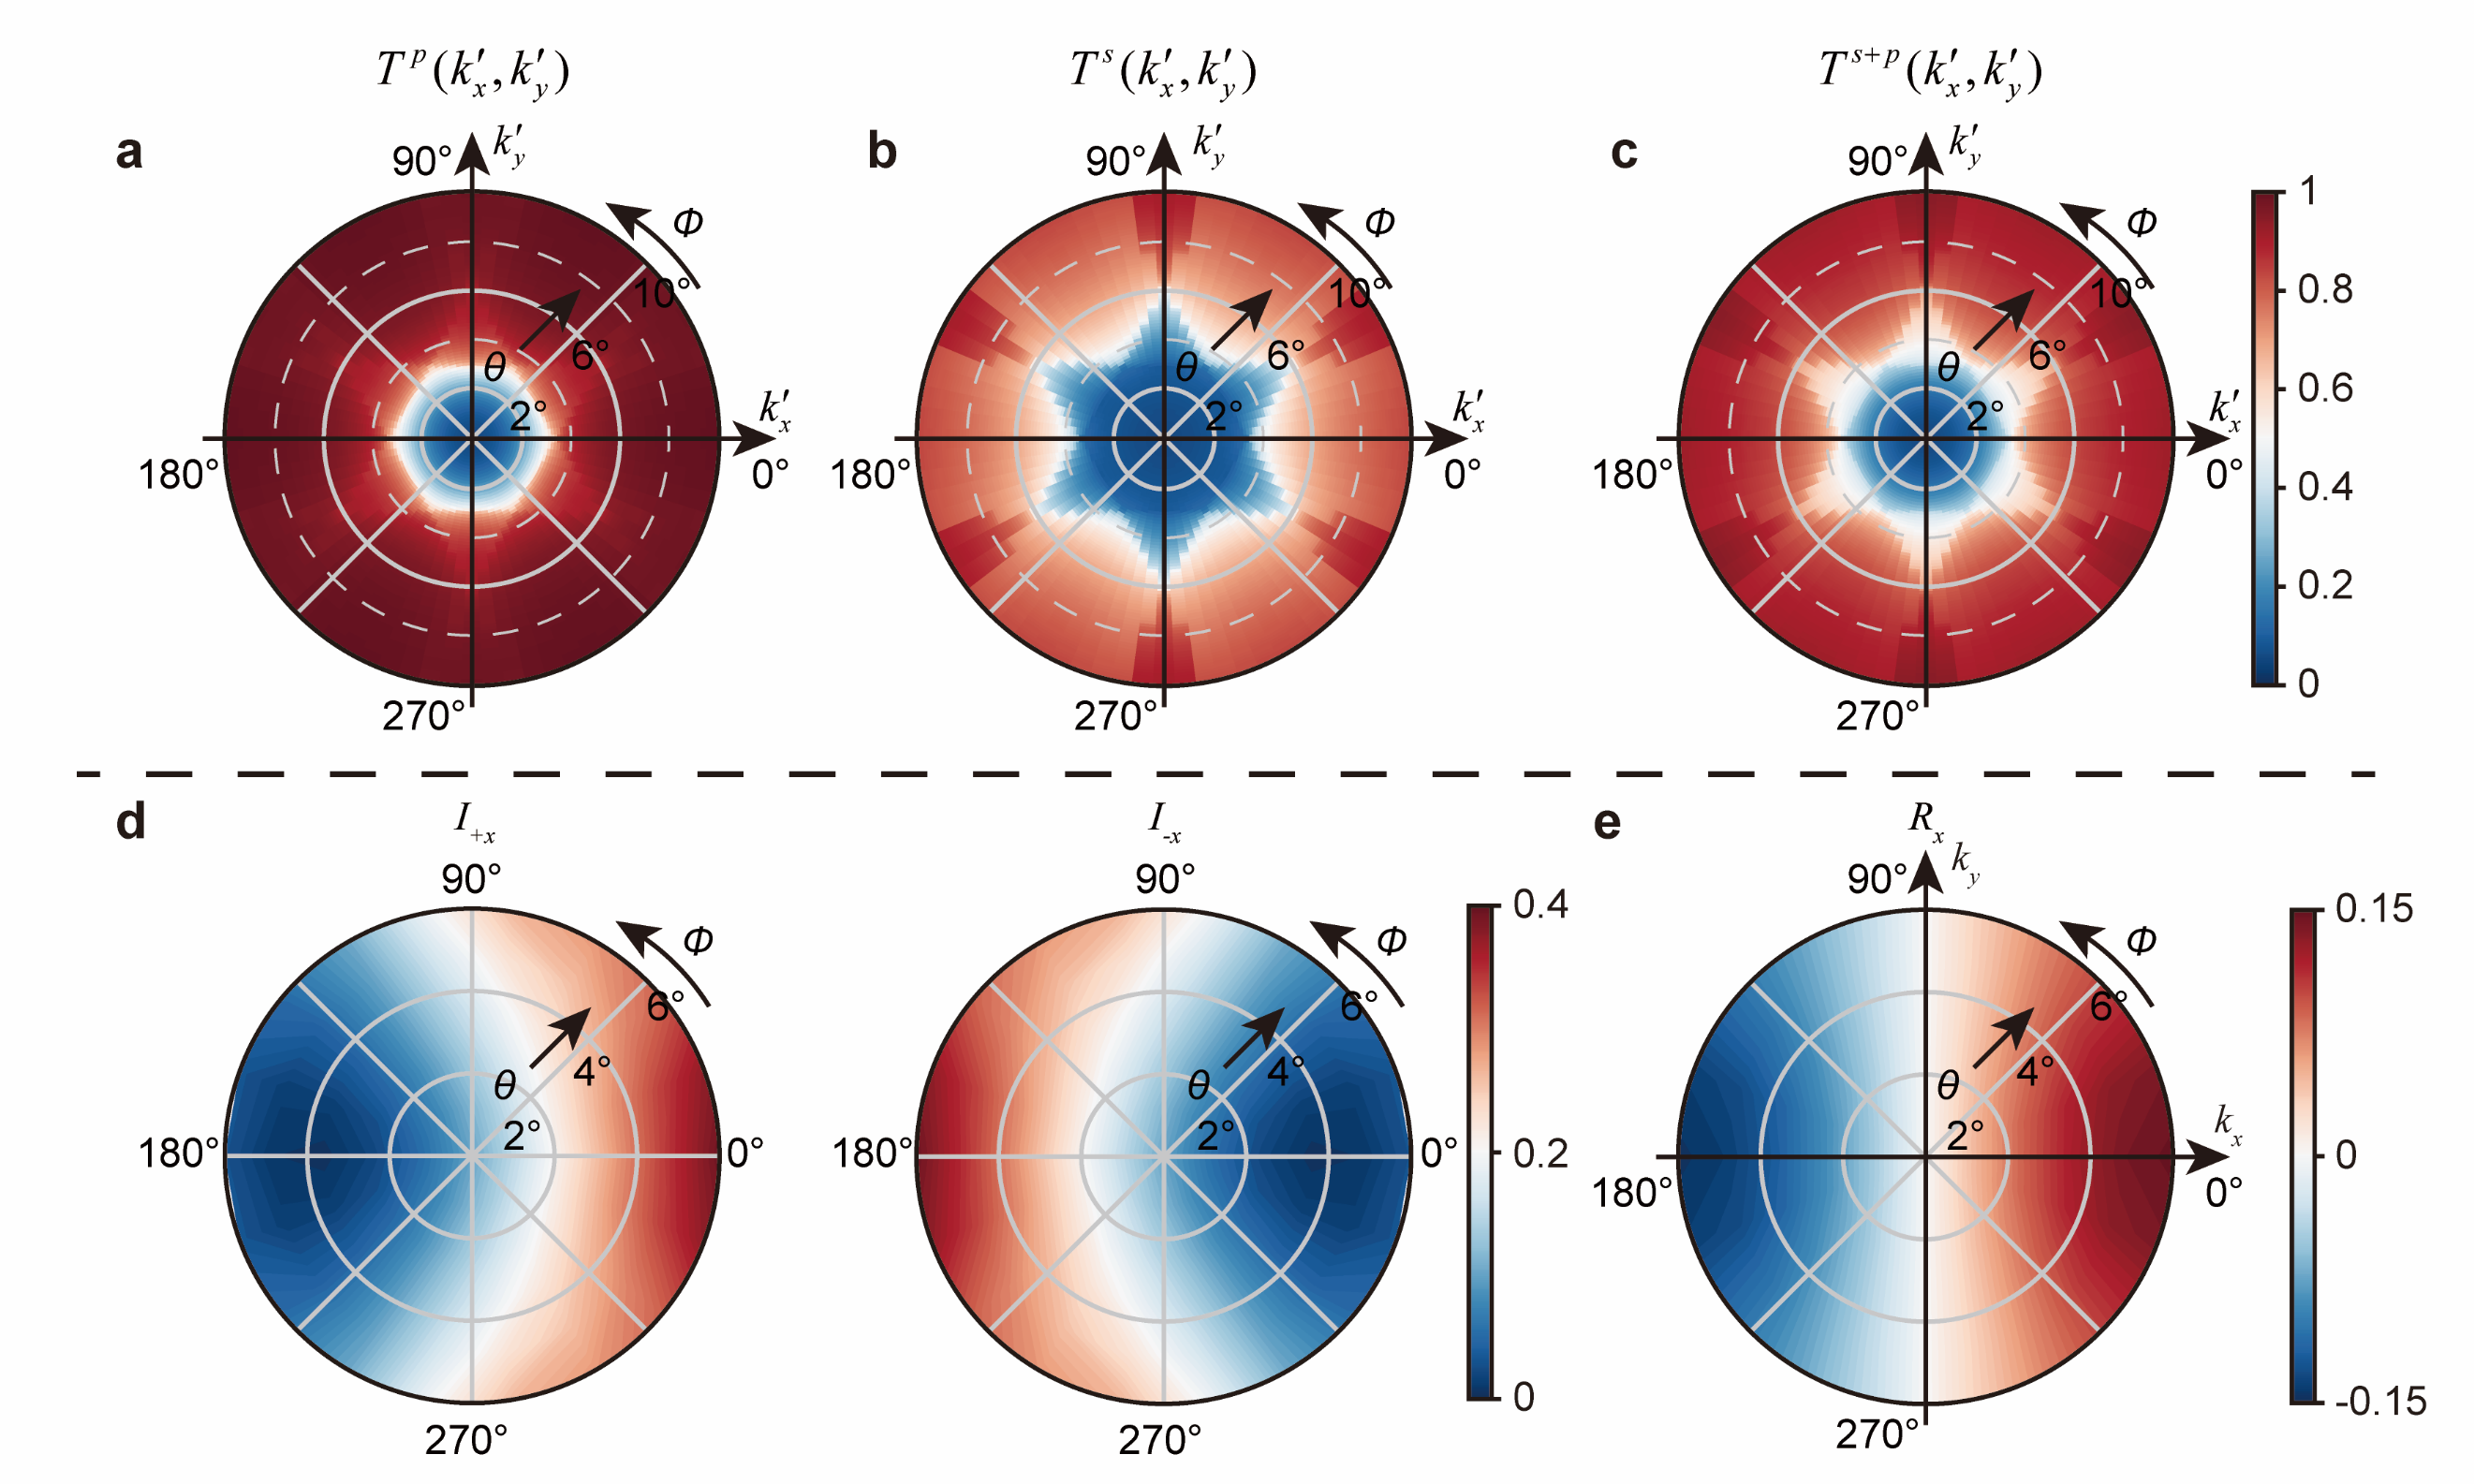


**Figure S3.** Transmittance spectra of the nonlocal metasurface and the dual-layer metasurface. Simulated transmittance of the nonlocal metasurface for *p*-polarized **a**, *s*-polarized **b**, and *s+p* polarized **c** at 785 nm wavelength. Simulated intensities *I±x*(*kx*, *ky*) **d**, and the resulting intensity ratio *Rx*(*kx*, *ky*) **e** of the dual-layer metasurfaces as functions of incident spatial frequencies *kx* and *ky*.

At the wavelength of 785 nm, we calculated the two-dimensional transmittance spectra for *p*-polarized, *s*-polarized, and *s+p* polarized as functions of the spatial frequencies *kx* and *ky* using the RCWA solver, as shown in Fig. S3a-c. The maximum incident angle *θ* is 10º, corresponding to the numerical aperture of 0.174. The full two-dimensional transmittance spectra and both exhibit a high-pass response and C6 rotational symmetry due to the structural symmetry.

Furthermore, to validate the performance of the dual-layer metasurface, we simulated it using the FDTD solver. The simulated structure is shown in Fig. 2h. The input source is an incident *s*-polarized and *p*-polarized plane wave with a specific polar and azimuth angle (*θ* and *φ*) pair (one pair per simulation). Two monitors are placed at the output of the metasurface to record the output intensities *I±x*. The maximum polar angle *θ* is 6º, corresponding to the NA of 0.1. The simulated intensities *I±x* and *Rx* are shown in Figs. S3d and e. Although the intensities *I±x* exhibit dependence not only on *kx* but also on *ky*, the influence of *ky* on *Rx* is substantially diminished. An arbitrary wavefront spatial frequency (*kx*, *ky*) can be determined by *Rx* and *Ry*.

## Supplementary Note 5: Fabrication tolerance analysis of the nonlocal metasurface

To evaluate the fabrication robustness of the designed dual-layer metasurface, we performed a tolerance analysis of the nonlocal metasurface's geometric parameters. We swept the TiO2 nanopillar radius from 165 nm to 195 nm and calculated the transmittance spectra using the RCWA solver, as shown in Fig. S4a. The resonant wavelength exhibits a monotonic redshift with increasing pillar radius, as illustrated in Fig. S4b. Figures S4c and d show the angular transmittance spectra for *s*- and *p*-polarized light as a function of spatial frequency (with ) for three selected radii, as shown in Figs. S4c and S4d. While deviations from the optimal radius lead to a slight degradation in the extinction ratio (*i.e.*, increased transmittance at ), the characteristic parabolic profile required for a high-pass filter is well preserved. These simulation results confirm that the designed metasurface maintains its high-pass filtering performance despite fabrication errors, demonstrating robust tolerance to diameter variations of up to ±15 nm.


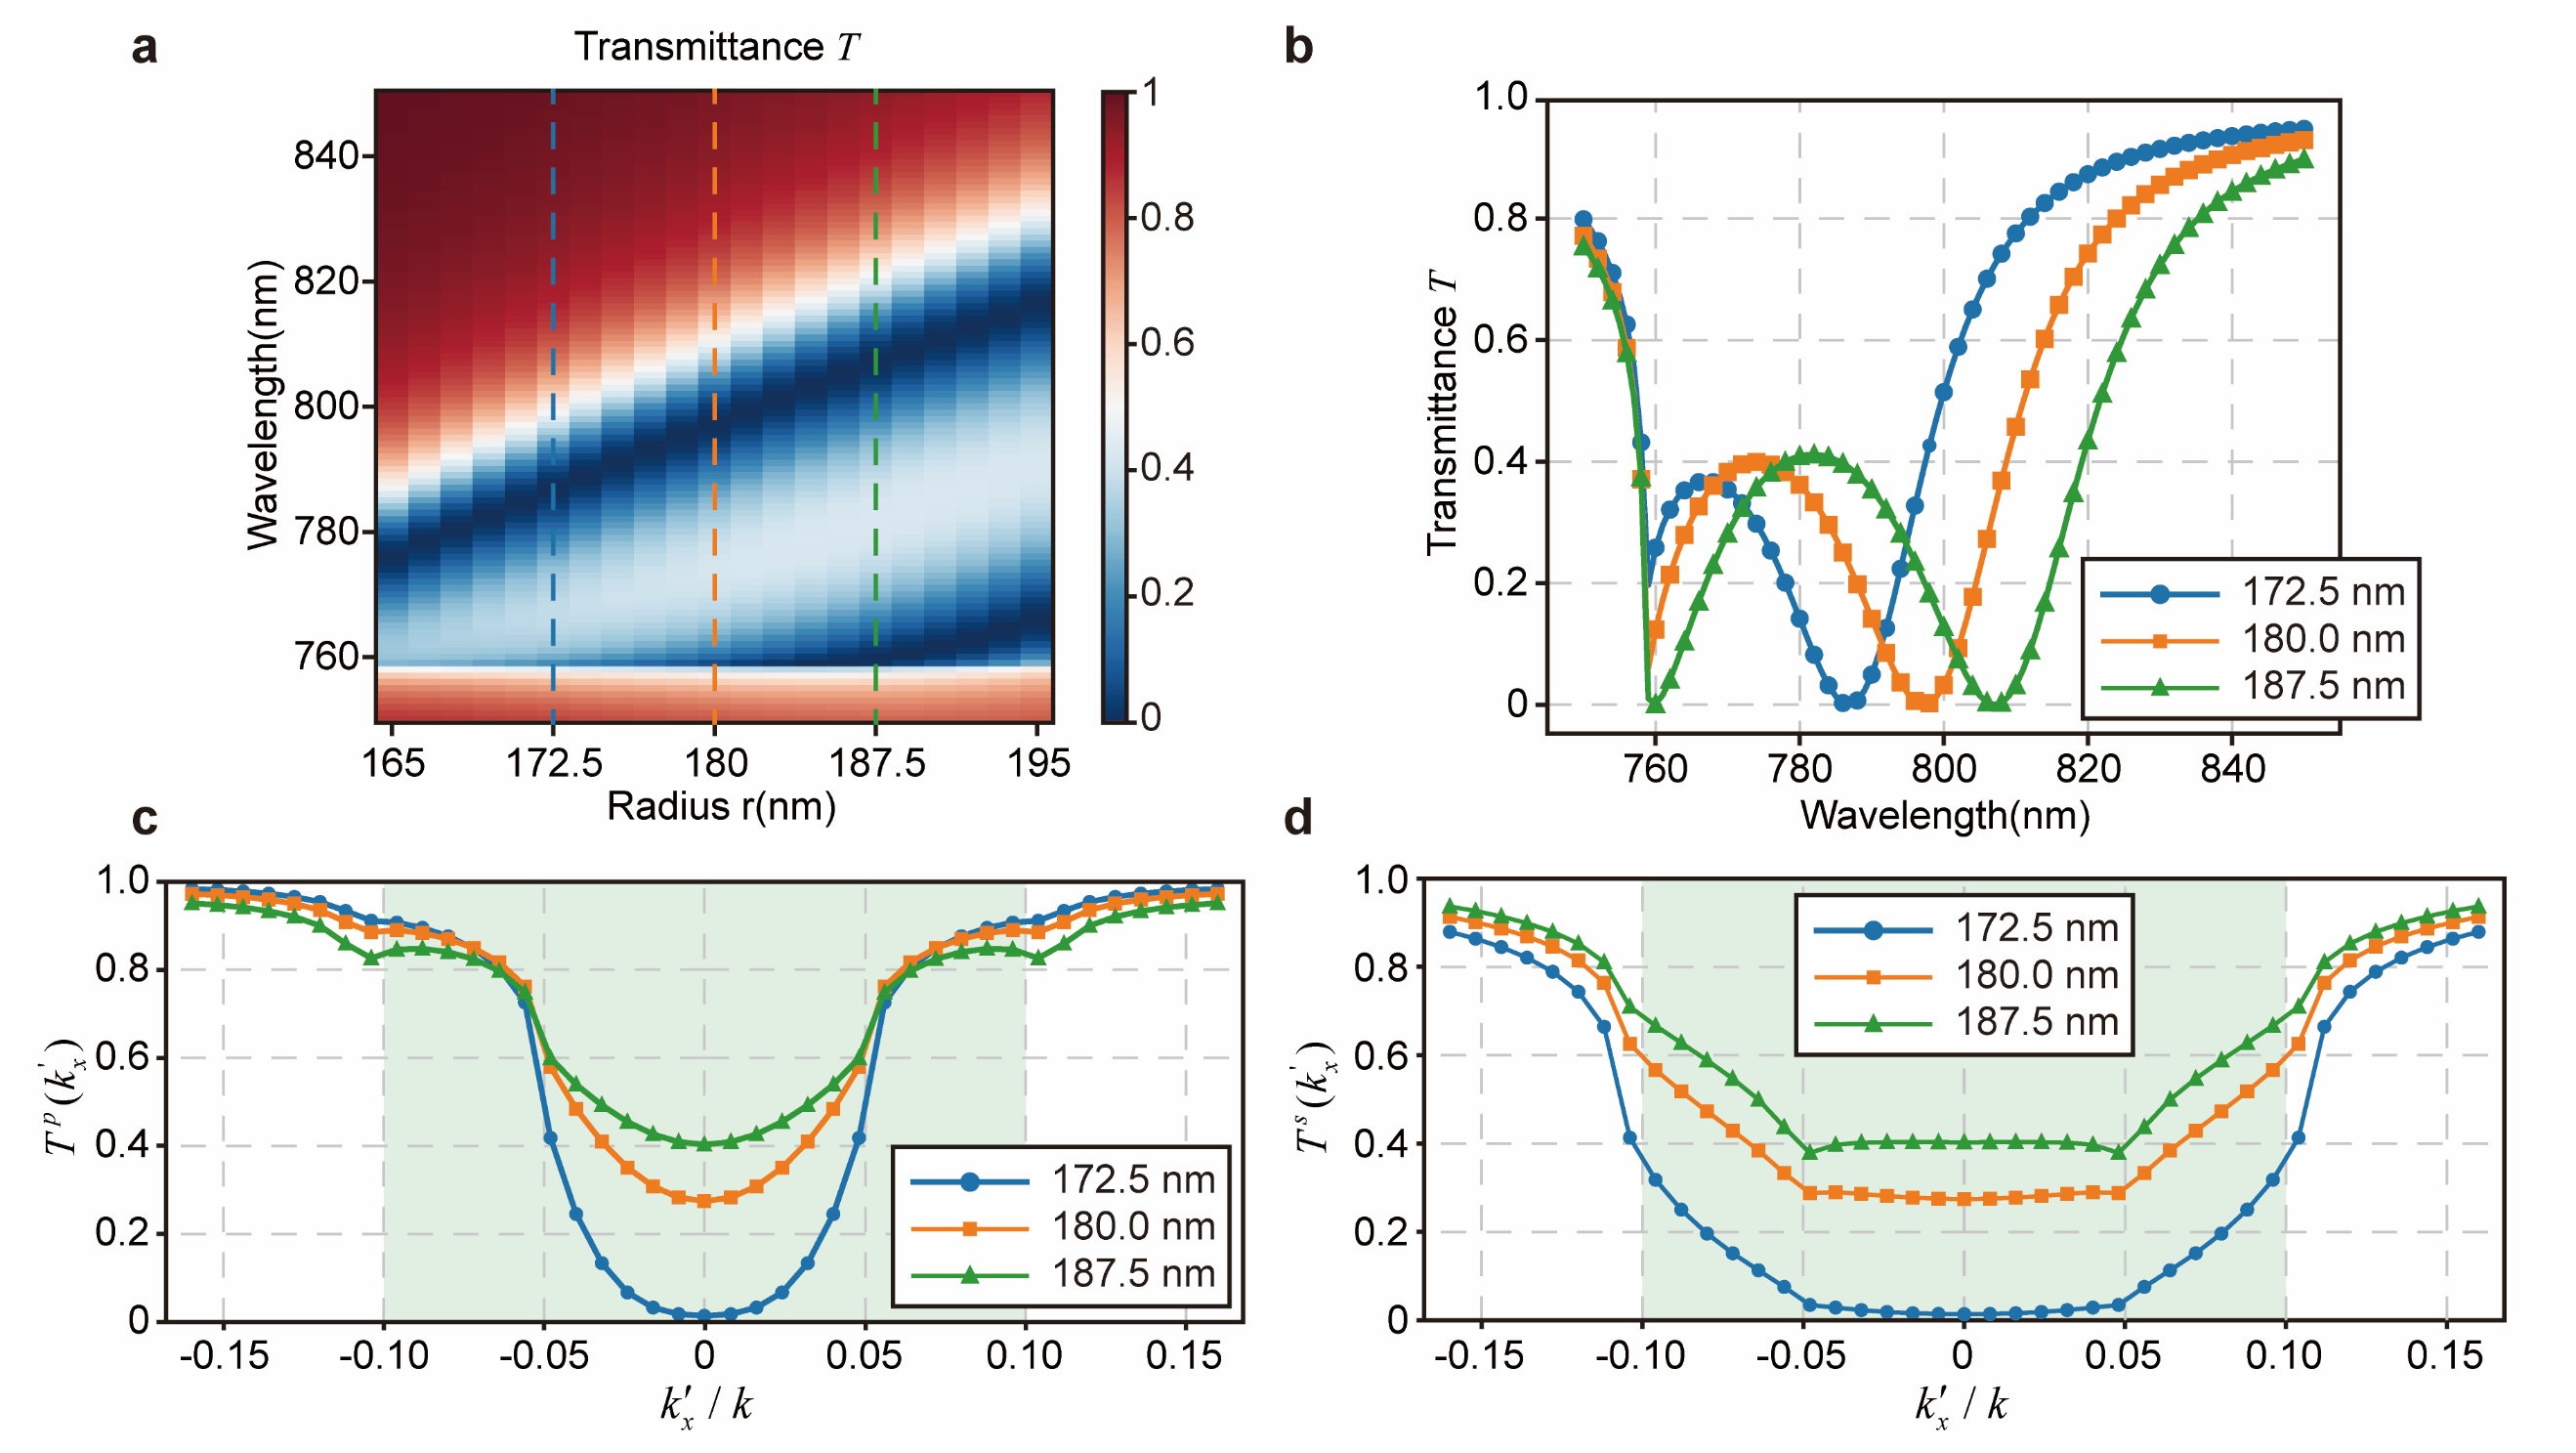


**Figure S4.** Fabrication-tolerance simulation results for the nonlocal metasurface. **a** Simulated transmittance spectra of the nonlocal metasurface under normal incidence as a function of wavelength and radius of the nanopillar. **b** Transmittance spectra extracted for the three selected radii (*r*=172.5, 180, 187.5 nm) at normal incidence, showing the redshift of the resonance dip. Simulated transmittance spectra for *p*-polarized **c**, and *s*-polarized **d** for three selected radii.

## Supplementary Note 6: Fabrication process of the pixelated deflector array and nonlocal metasurface


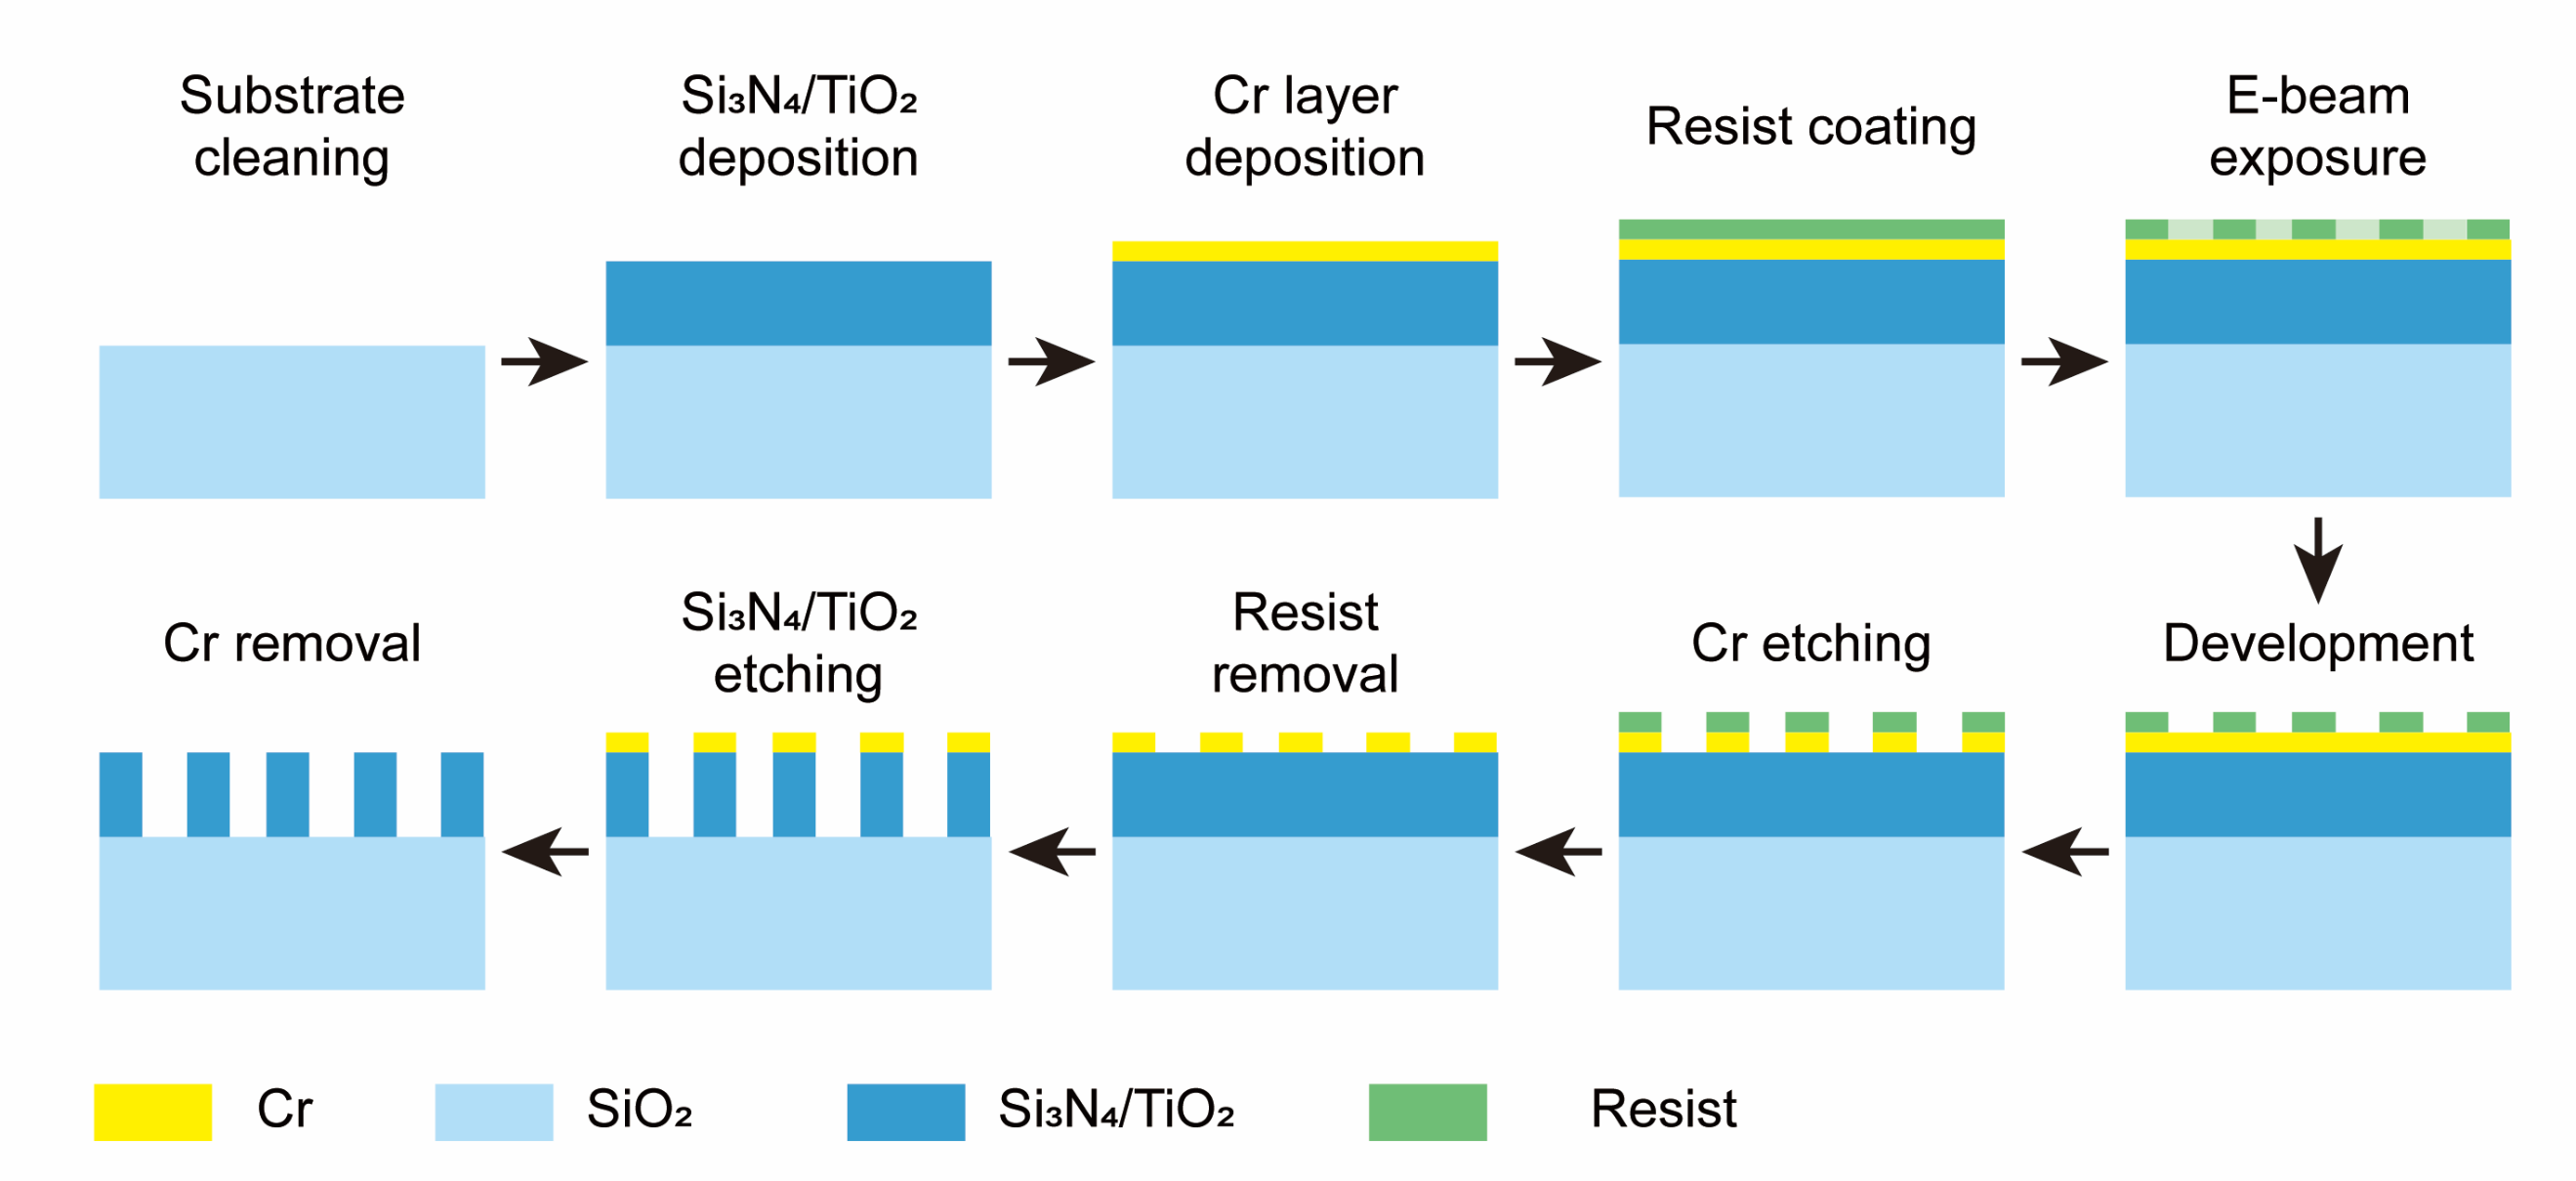


**Figure S5.** Fabrication process of the pixelated deflector array and nonlocal metasurface.

## Supplementary Note 7: Multipolar decomposition analysis of the TiO2 unit cell


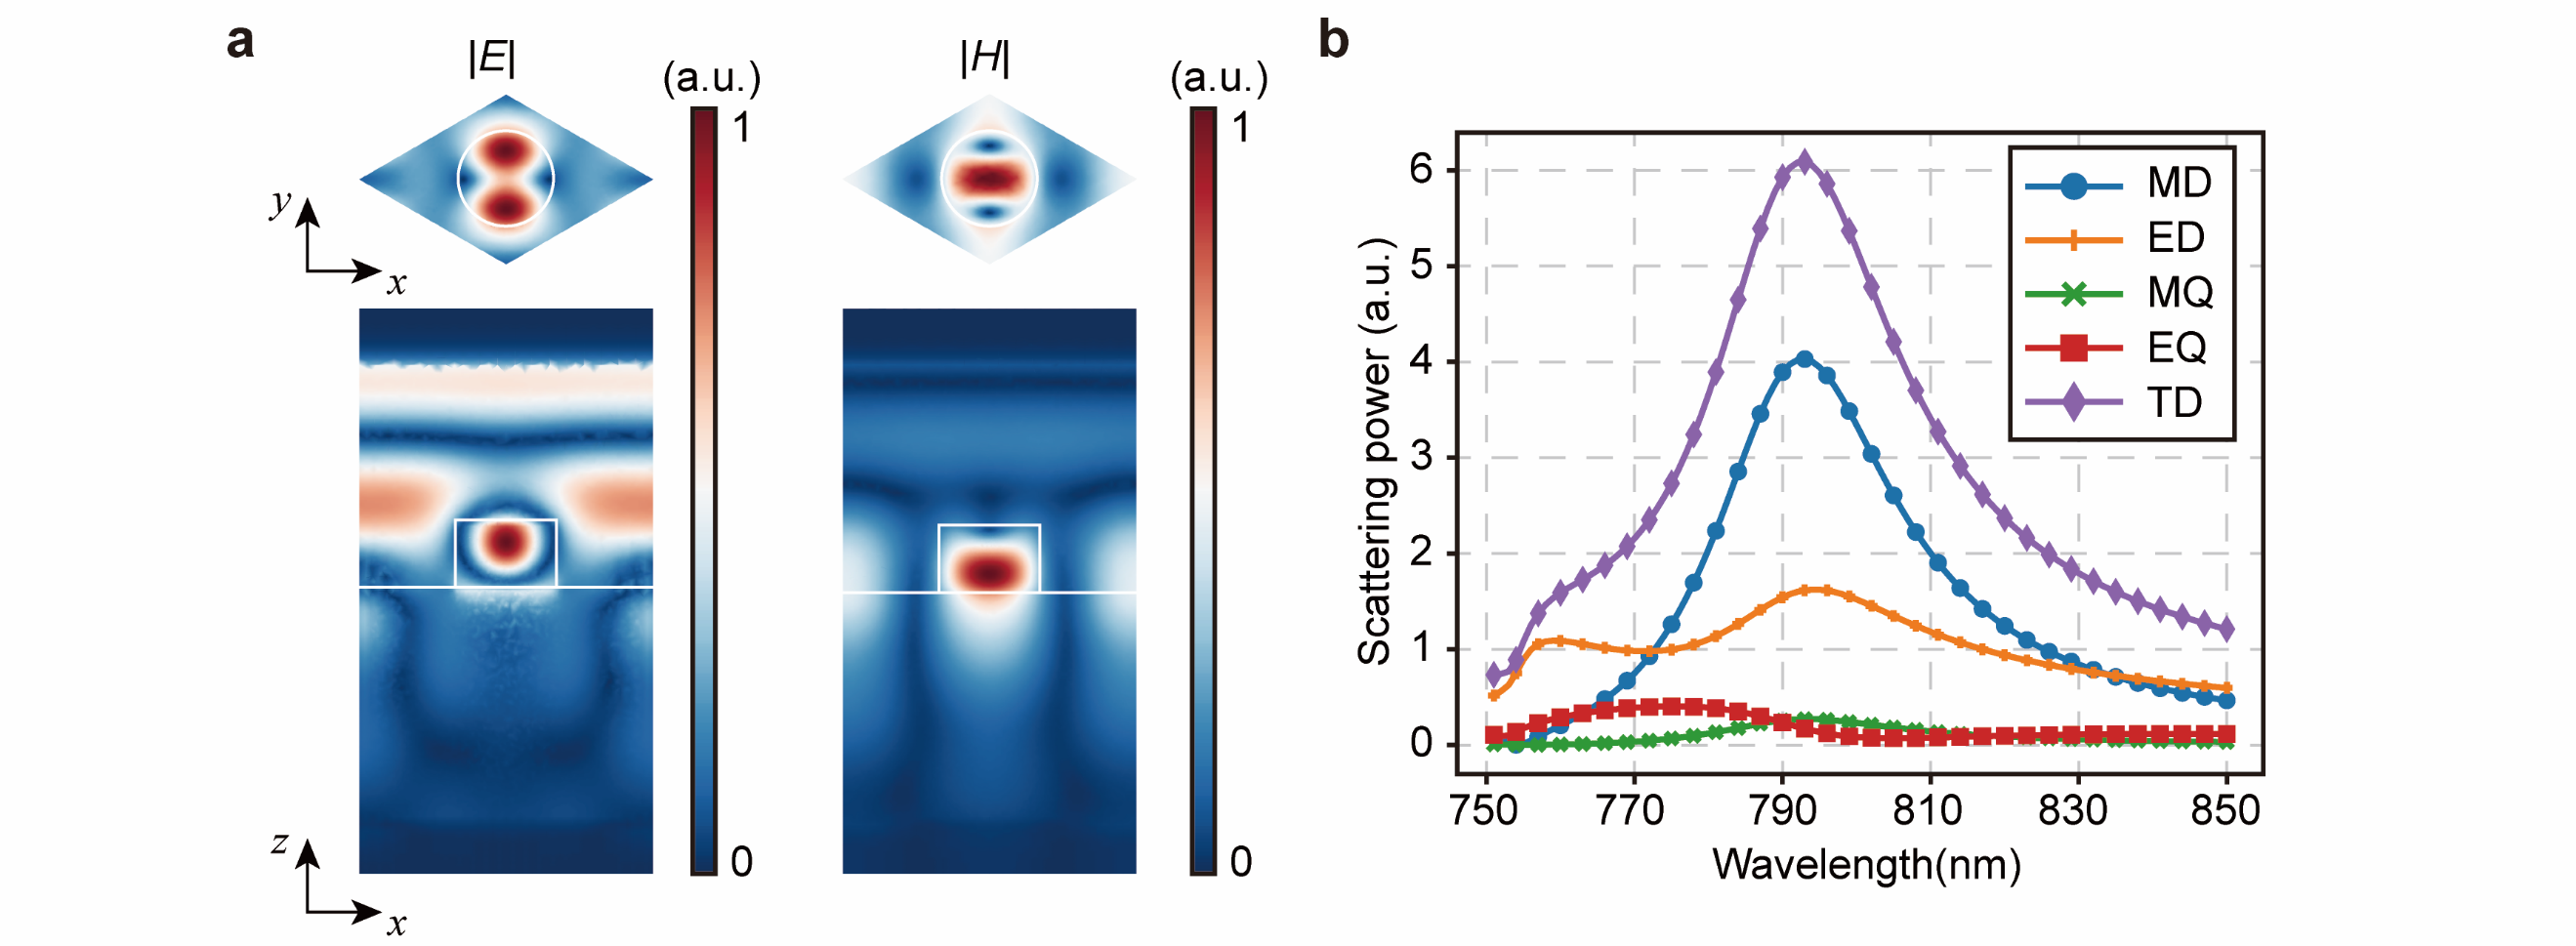


**Figure S6.** Electromagnetic multipole characteristics of the TiO2 unit cell. **a** Normalized electric and magnetic field distributions in the *x-y* (top) and *x-z* (bottom) planes at 790 nm. The white outlines indicate the boundaries of the TiO2 nanopillar. **b** Calculated spectral multipole decomposition (TD: Total Dipole; MD: Magnetic Dipole; ED: Electric Dipole; MQ: Magnetic Quadrupole; EQ: Electric Quadrupole).


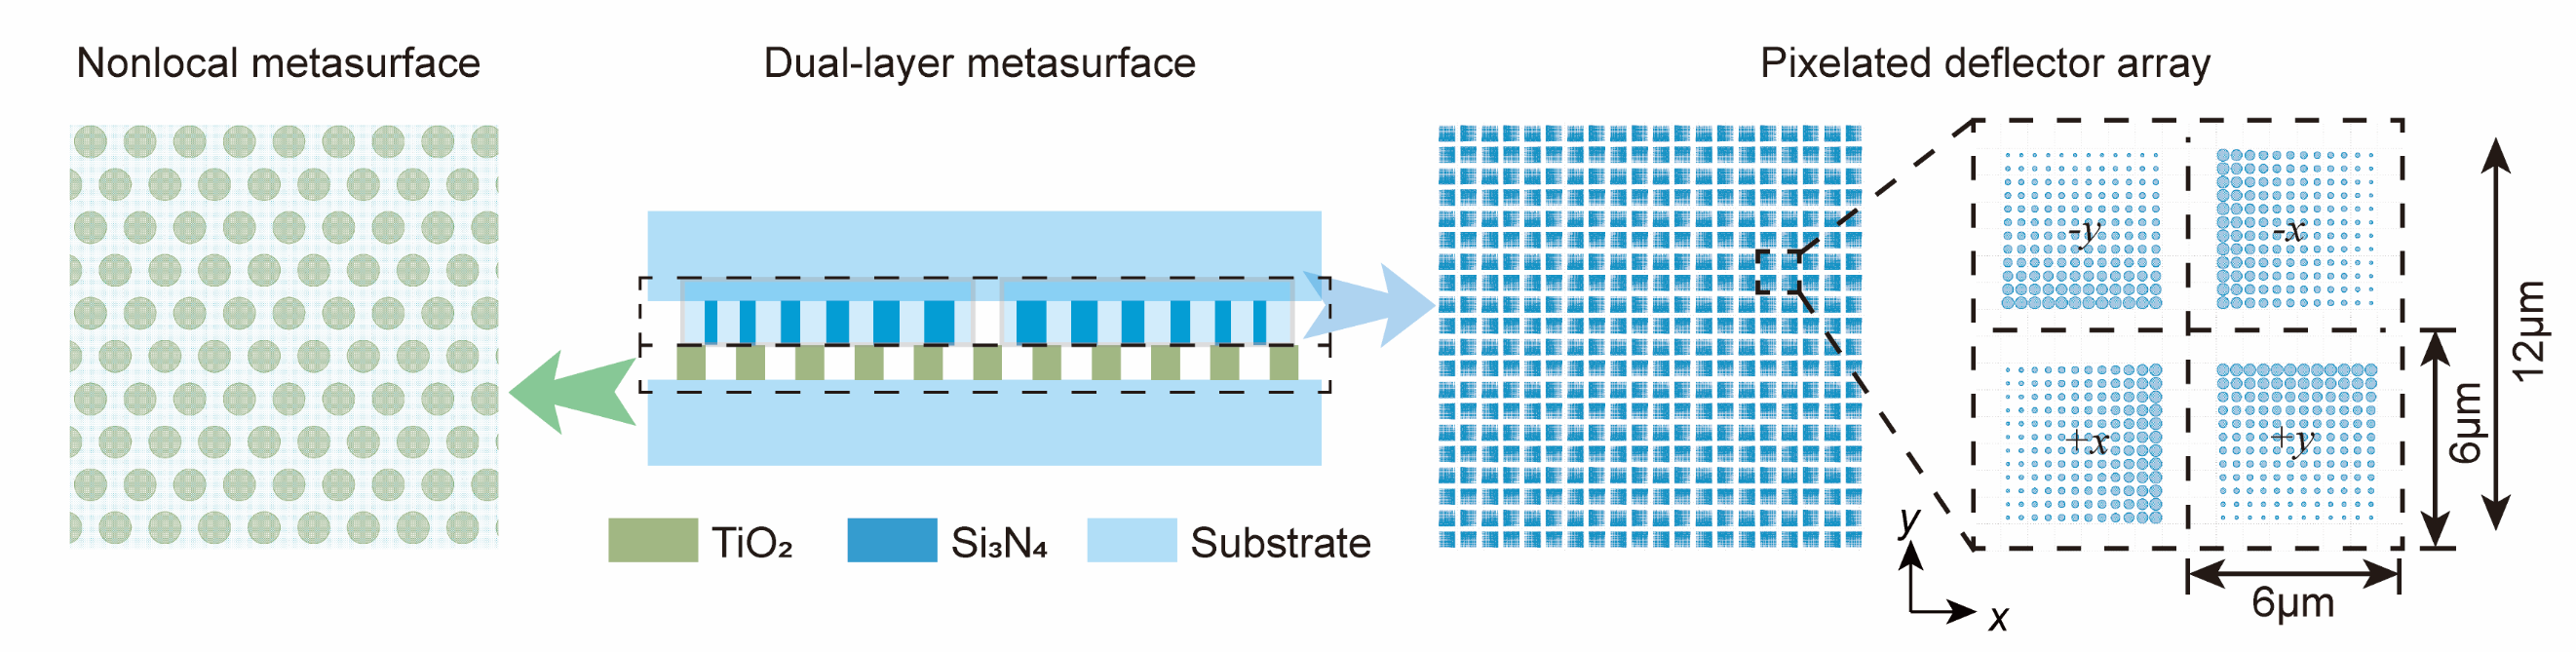


**Figure S7.** Schematic of the dual-layer metasurface. The pixelated deflector array and the nonlocal metasurface are integrated onto distinct fused-silica substrates. To suppress optical crosstalk between the adjacent ±*x* and ±*y* sub-pixels, a 2 µm guard gap is implemented between the deflector regions. Consequently, the size of an individual sub-pixel is 6×6 µm2, corresponding to a spatial sampling resolution of 12×12 µm².

To elucidate the origin of the resonance at 790 nm, we performed a multipolar decomposition of the electromagnetic fields within the unit cell of the designed nonlocal metasurface using the Finite Element Method (FEM). Figure S6a shows the normalized electric and magnetic field profiles in the x-y and x-z planes at the resonance wavelength of 785 nm under normal incidence. The simulation used a plane-wave source incident from the top. To quantify the contributions of different multipoles, the scattered power was decomposed into electric dipole (ED), magnetic dipole (MD), electric quadrupole (EQ), and magnetic quadrupole (MQ) modes, as shown in Figure S6b. The decomposition results reveal that the resonance at approximately 790 nm is dominated by an MD resonance, characterized by a circular displacement-current loop within the nanopillar and strong magnetic-field confinement at its center.

## Supplementary Note 8: Performance analysis for the wavefront sensing system

To analyze the minimal detectable phase gradient Δ*φ*/Δ*r*, we consider a phase distribution where the phase gradient is confined to the *x*-direction (), with the phase gradient along the *y*-direction being zero (). We focus our analysis on in the following sections.

We assume that the relationship between the *kx* and the intensity ratio *Rx* can be determined by the following equation:

(S10)

where *m* is the constant coefficient, and m can be determined by the following equation:

(S11)

The minimal detectable *kx*, , can be determined by the following equation:

(S12)

(S13)

When the incident wave approximates normal incidence, , and Δ*IR* can be expressed as:

(S14)

where SNR is the signal-to-noise ratio of the image sensor. For a camera with a SNR of 40 dB,  can be calculated as:

(S15)

Therefore, the minimal detectable phase gradient is 40 mrad/µm. For a camera with a high SNR of 70 dB, the minimal detectable phase gradient is 1.27 mrad/µm.

## Supplementary Note 9: Performance comparison with the existing wavefront sensor

Various wavefront sensing methods have been developed to improve spatial resolution, angular dynamic range, and angular resolution, including the near-field wavefront sensor1, Meta Shack–Hartmann wavefront sensor2, quadriwave lateral shearing interferometry (QWLSI)3, and on-chip wavefront sensor (OCWS)5. Table S1 compares the performance of our method with the existing wavefront sensor. The angular dynamic range and angular resolution of our system are 6° and 158 μrad, respectively.

**Table S1** Performance comparison with the existing wavefront sensor.

| **Name** | **Spatial resolution** | **Angular Dynamic range** | **Angular resolution** |
| --- | --- | --- | --- |
| Near field WFS[1] | 10.4 µm | [-30°, 30°] | 552 μrad @ (16Bit) |
| Meta SHWS[2] | 12.95 µm | [-8°, 8°] | 4.7 mrad |
| QWLSI[3] | 19.5 µm | [-2.8°, 2.8°] | - |
| SHWS[4] | 150 µm | [-0.5°, 0.5°] | 6.25 μrad |
| OCWS[5] | 34 µm | [-10°, 10°] | - |
| **Our method** | **12 µm** | **[-6°, 6°]** | **158 μrad @ (16Bit)** |

## Reference

1. Yi, S. *et al.* Angle-based wavefront sensing enabled by the near fields of flat optics. *Nat. Commun.* **12**, 6002 (2021).

2. Go, G.-H. *et al.* Meta Shack–Hartmann wavefront sensor with large sampling density and large angular field of view: phase imaging of complex objects. *Light Sci. Appl.* **13**, 187 (2024).

3. Khadir, S. et al. Metasurface Optical Characterization Using Quadriwave Lateral Shearing Interferometry. *ACS Photonics* **8**, 603–613 (2021).

4. <https://www.thorlabs.com/item/WFS31-5C_M>

5. Chen, W. *et al.* Computational Wavefront Sensing on a Photonic Integrated Chip. *Laser & Photonics Reviews* **20**, e00710 (2026).
